# Supplementary material for: A theoretical model of inflammation- and mechanotransduction-driven asthmatic airway remodelling
Source: PubMed Central journal article supplement (PMC6154265; doi:10.1007/s10237-018-1037-4), 2018-07-02
Supplement: 10237_2018_1037_MOESM1_ESM.pdf [file 10237_2018_1037_MOESM1_ESM.pdf]

## Online Resources: A theoretical model of inflammation- and mechanotransduction-driven asthmatic airway remodelling

### 1 Additional Mathematical Details

This section provides additional details about the model development and numerical solution techniques.

#### 1.1 Fiber Directions

Considering a cylindrical body composed of an anisotropic material reinforced by two sets of fibers dispersed in the  $\theta - z$  plane, the undeformed fibre directions in polar cylindrical co-ordinates are given by

$$\mathbf{m}_{0,a}^{(1)} = \cos \Theta_a \mathbf{e}_\theta + \sin \Theta_a \mathbf{e}_z, \quad (\text{S1a})$$

$$\mathbf{m}_{0,a}^{(2)} = -\cos \Theta_a \mathbf{e}_\theta + \sin \Theta_a \mathbf{e}_z, \quad (\text{S1b})$$

for a given constituent  $a$ , where  $\mathbf{e}_\theta$  and  $\mathbf{e}_z$  are unit vectors in the circumferential and axial directions, respectively. The current fibre direction, denoted  $\mathbf{m}_a^{(j)}$ , is obtained from the undeformed fibre directions via a push-forward operation,

$$\mathbf{m}_a^{(j)} = \frac{\mathbf{F} \cdot \mathbf{m}_{0,a}^{(j)}}{\sqrt{\alpha_a^{(j)}}}, \quad (\text{S2a})$$

where

$$\alpha_a^{(j)} = \mathbf{m}_{0,a}^{(j)} \cdot \mathbf{C} \mathbf{m}_{0,a}^{(j)}, \quad j = 1, 2, \quad (\text{S2b})$$

is the square of the fibre stretch ratio (Holzapfel, 2000), and  $\mathbf{C} = \mathbf{F}^T \mathbf{F}$  is the right Cauchy-Green tensor. We further posit that all fibres, including both ASM and collagen fibres in the ECM, are oriented along the circumference (Ijima et al, 2017), so  $\Theta_a = \Theta = 0^\circ$ .

#### 1.2 Specific Forms of the Strain Energy Functions

Below we define the forms of the strain energy functions for the tissue constituents  $a = p, c, e$ . The neo-Hookean form of the strain energy function for the proliferating ( $p$ ) airway smooth muscle cells (ASMCs) is given by

$$W_p = \frac{1}{2} \eta_p (I_1 - 3), \quad (\text{S3a})$$

where  $\eta_p$  is a material parameter representing the passive stiffness of proliferating cells, and  $I_1 = \text{tr} \mathbf{C}$  is a strain invariant. The form for the contractile ( $c$ ) ASMCs is given by

$$W_c = \frac{1}{2} \eta_c (I_1 - 3) + \sum_{j=1,2} \frac{C_c}{2\beta_c} \left( \exp^{\beta_c (\alpha_c^{(j)} - 1)^2} - 1 \right), \quad (\text{S3b})$$

where material parameters are  $\eta_c$ , representing the passive (isotropic) stiffness of contractile cells,  $C_c$ , representing their passive (anisotropic) stiffness, and  $\beta_c$ , accounting for nonlinear stiffening with increasing deformation. The form for the extracellular matrix (ECM or  $e$ ) is modeled similarly, so

$$W_e = \frac{1}{2} \eta_e (I_1 - 3) + \sum_{j=1,2} H \left( \alpha_e^{(j)} - \lambda_u^2 \right) \frac{C_e}{2\beta_e} \left( \exp^{\beta_e (\alpha_e^{(j)} - \lambda_u^2)^2} - 1 \right), \quad (\text{S3c})$$

with material parameters  $\eta_e$ , representing the passive (isotropic) stiffness of the embedded ECM cells,  $C_e$ , representing fibre density, and  $\beta_e$ , parametrizing the gradual recruitment of collagen fibres.

### 1.3 Numerical Solution Procedure

This section provides specific forms of the model equations that were used in the numerical scheme, as well as the numerical techniques that were used to solve the PDEs. First, we derive the equations governing the growth in each layer of the airway wall. Next, we derive a nonlinear equation that represents the elastic deformation of a two-layer multi-phase cylinder subject to pressure boundary conditions. Finally, we discuss the specific numerical schemes we used to solve these equations and the governing PDEs in the main text.

*Growth.* The radial growth of the airway is determined as follows. Integrating (2.27) with respect to  $\xi$  gives the velocity in the outer layer as

$$\xi v(\xi)^{(o)} = \int_{\xi_{int}}^{\xi} \xi' q^{(o)} d\xi' + K_1, \quad \xi_{int} \leq \xi \leq \xi_2. \quad (\text{S4a})$$

Similarly, the velocity in the inner layer is given by

$$\xi v(\xi)^{(i)} = \int_{\xi_1}^{\xi} \xi' q^{(i)} d\xi' + K_2, \quad \xi_1 \leq \xi \leq \xi_{int}. \quad (\text{S4b})$$

The constants  $K_1$  and  $K_2$  are determined by applying the zero velocity boundary condition (2.31c) and continuity of velocity at  $\xi_{int}$  (2.31d), respectively. The interface velocity is then given by (S4a) evaluated at  $\xi = \xi_{int}$  to give

$$v(\xi_{int}) = \frac{d\xi_{int}}{dt} = -\frac{1}{\xi_{int}} \int_{\xi_{int}}^{R_2} \xi q^{(o)} d\xi, \quad (\text{S4c})$$

which is solved numerically for  $\xi_{int}$ . It is then used with (S4b) to obtain an expression for the velocity at the inner wall, given by

$$v(\xi_1) = \frac{d\xi_1}{dt} = \frac{1}{\xi_1} \left[ \xi_{int} v(\xi_{int}) - \int_{\xi_1}^{\xi_{int}} \xi q^{(i)} d\xi \right], \quad (\text{S4d})$$

which is again solved numerically for  $\xi_1$ .

*Elastic deformation.* Integrating (2.12) and applying (2.13a) gives the radial stress for the inner layer

$$T_{rr}^{(i)} = \int_{r_1}^r \frac{1}{r'} (T_{\theta\theta}^{(i)} - T_{rr}^{(i)}) dr' - P_1, \quad r_1 \leq r \leq r_{int}, \quad (\text{S5a})$$

and applying (2.13d) gives the radial stress for the outer layer

$$T_{rr}^{(o)} = T_{rr}^{(i)}(r_{int}) + \int_{r_{int}}^r \frac{1}{r'} (T_{\theta\theta}^{(o)} - T_{rr}^{(o)}) dr' - P_2, \quad r_{int} \leq r \leq r_2. \quad (\text{S5b})$$

Applying continuity of stress (2.13c) thus gives

$$P_1 - P_2 = \int_{r_1}^{r_{int}} \frac{1}{r} (T_{\theta\theta}^{(i)} - T_{rr}^{(i)}) dr + \int_{r_{int}}^{r_2} \frac{1}{r} (T_{\theta\theta}^{(o)} - T_{rr}^{(o)}) dr, \quad (\text{S5c})$$

wherein  $r_1$  and  $r_2$  can be expressed in terms of  $r_{int}$  via (2.4), since  $\xi_1$  and  $\xi_{int}$  are known from the solution of (S4), and  $(i)$  denotes variables computed in the inner layer and  $(o)$  those in the outer layer. Together with the radial and circumferential stress components of the Cauchy stress specified by (2.5) and (S3), (S5c) is therefore an algebraic equation in the unknown  $r_{int}$ . At each time step, a root finding algorithm (`fzero.m`), is used to solve the equilibrium equation (S5c) for  $r_{int}$ . All other variables can be evaluated once this is known.

Table 1: Initial Conditions and Airway Geometry

| Parameter       | Definition                         | Inner layer | Outer layer           | Units               |
|-----------------|------------------------------------|-------------|-----------------------|---------------------|
| $\mu _{t_0}$    | Inflammatory factor, $\mu$         | 0           | 0                     | mg mm <sup>-3</sup> |
| $k _{t_0}$      | Contractile agonist, $k$           | 0           | 0                     | mg mm <sup>-3</sup> |
| $\Phi_c _{t_0}$ | Contractile ASMC volume fraction   | 0           | 0.20                  |                     |
| $\Phi_p _{t_0}$ | Proliferating ASMC volume fraction | 0           | 1.50x10 <sup>-3</sup> |                     |
| $\Phi_e _{t_0}$ | ECM volume fraction                | 0.30        | 9.85x10 <sup>-2</sup> |                     |
| $R_1$           | Inner radius                       |             | 1.800                 | mm                  |
| $R_{int}$       | Interface radius                   |             | 1.818                 | mm                  |
| $R_2$           | Outer radius                       |             | 2.340                 | mm                  |

*Numerical techniques.* Numerical solutions to the system of coupled PDEs, given by (2.26), with (2.18-2.25), were obtained via the method of lines as follows. A finite difference spatial discretisation, with upwinding applied to convective terms, was employed. For simplicity, we fixed with the number of nodes at 10 in the (thin) inner layer and 100 in the outer layer, noting that, as the airway grows,  $\Delta r$  is not constant<sup>1</sup>. The resulting system, along with (S4), was time-stepped in MATLAB using an ODE solver (`ode45.m` or `ode15s.m`; the latter is used when inflammatory or agonist challenge frequency is very high resulting in a stiff system of equations), with the integrals evaluated using `trapz.m`. This method was applied separately to the inner and outer layers and solutions matched at  $r_{int}$ .

## 2 Model Parameters and Initial Conditions

Initial conditions for inflammatory factor,  $\mu$ , contractile agonist concentration,  $k$ , and volume fractions,  $\Phi_a$ ,  $a = p, c, e$ , along with the initial geometry of the airway, are given in Table 1. Rate constants for the mass balance equations and material parameters, consistent between the two layers, are given in Table 2. Model parameters differing between the layers are given in Table 3.

## 3 Sensitivity Study

We performed a one-at-a-time sensitivity study by varying parameters  $a_\mu$ ,  $c_{d\mu}$ ,  $a_k$ ,  $c_{dk}$ ,  $T_c$ ,  $a_{k\mu}$ , and  $a_c$  (Fig. S1). For each parameter, simulations were performed for a range of 100 values, with inflammatory challenges (except for parameter  $a_k$ , in which the airways were challenged with contractile agonists) at a frequency of one per day for 50 days, followed by a resolution period. Change in inner radius, from the initial value ( $R_1=1.8\text{mm}$ ), at 5 days post final challenge was used to assess the results. The model is highly sensitive to  $a_\mu$  and  $c_{d\mu}$ , as increased remodelling (represented by decreased inner radius) is associated with increasing magnitude ( $a_\mu$ ), decreasing clearance ( $c_{d\mu}$ ) of inflammatory factor  $\mu$ , with the former exhibiting a linear response above a certain threshold and the latter a nonlinear response. Moreover, the model is highly sensitive to contractile agonist magnitude ( $a_k$ ) in the agonist-challenge simulations. Note that the curve for  $a_k$  in Fig. S1 does not pass through zero. The reason for this is that, at the default value of  $a_k$  and  $c_{dk}$  (Table 2), the simulations with contractile agonist challenges at a frequency of 1 per day over 50 days results in contraction into the lumen. A nonlinear decrease in radius is associated with decreasing clearance of contractile agonist concentration,  $k$ , with a strong threshold effect observed with decreasing  $c_{dk}$ . The model is less sensitive to this parameter than magnitude, clearance of  $\mu$  (subject to inflammatory challenges).

<sup>1</sup> Remark: Initially,  $\Delta r = 0.002\text{mm}$  in the inner layer and  $0.005\text{mm}$  in the outer layer. For all times,  $\Delta r < 0.2\text{mm}$ , even in the extreme (unrealised) case in which only the airway inner layer grows into the lumen.

Table 2: Default Model Parameters Consistent Between the Two Layers

| Parameter                                      | Definition                                                              | Value                 | Units                                                                  |
|------------------------------------------------|-------------------------------------------------------------------------|-----------------------|------------------------------------------------------------------------|
| <u>Constants</u>                               |                                                                         |                       |                                                                        |
| $\rho_c^T$                                     | Contractile ASMC density                                                | 1.050                 | mg mm <sup>-3</sup>                                                    |
| $\rho_p^T$                                     | Proliferative ASMC density                                              | 1.050                 | mg mm <sup>-3</sup>                                                    |
| $\rho_e^T$                                     | Extracellular matrix density                                            | 1.050                 | mg mm <sup>-3</sup>                                                    |
| $\rho_f^T$                                     | Fluid mass density                                                      | 1.000                 | mg mm <sup>-3</sup>                                                    |
| $\Phi_w$                                       | Fluid volume fraction                                                   | 0.70                  |                                                                        |
| <u>Inflammation and Agonist Rate Constants</u> |                                                                         |                       |                                                                        |
| $a_\mu$                                        | Stimulus amplitude for inflammatory factor, $\mu$                       | 3                     | mg mm <sup>-3</sup> day <sup>-1</sup>                                  |
| $c_{d\mu}$                                     | Decay rate of inflammatory factor, $\mu$                                | 5                     | day <sup>-1</sup>                                                      |
| $\mu_1$                                        | First inflammatory threshold                                            | 1                     | mg mm <sup>-3</sup>                                                    |
| $\mu_2$                                        | Second inflammatory threshold                                           | 2.5                   | mg mm <sup>-3</sup>                                                    |
| $a_k$                                          | Stimulus amplitude for contractile agonist, $k$                         | 4.64x10 <sup>-2</sup> | mg mm <sup>-3</sup> day <sup>-1</sup>                                  |
| $c_{dk}$                                       | Decay rate of contractile agonist, $k$                                  | 2                     | day <sup>-1</sup>                                                      |
| $a_{k\mu}$                                     | Inflammation-induced agonist release coefficient                        | 0.001                 | day <sup>-1</sup>                                                      |
| $a_c$                                          | Contraction-induced agonist release coefficient                         | 0.001                 | mg mm <sup>-3</sup> cmH <sub>2</sub> O <sup>-1</sup> day <sup>-1</sup> |
| <u>Event Parameters</u>                        |                                                                         |                       |                                                                        |
| $d$                                            | Duration of inflammation/agonist administration                         | 1/3                   |                                                                        |
| $\sigma$                                       | Event parameter                                                         | 0.01                  |                                                                        |
| $\omega$                                       | Inflammation, $\mu$ , or contractile agonist, $k$ , challenge frequency | 1                     | day <sup>-1</sup>                                                      |
| $T$                                            | Time scale                                                              | 1000                  | days                                                                   |
| <u>Mechanical/Material Parameters</u>          |                                                                         |                       |                                                                        |
| $\eta_p$                                       | Proliferative ASMC passive isotropic stiffness                          | 51.84                 | cmH <sub>2</sub> O                                                     |
| $\eta_c$                                       | Contractile ASMC passive isotropic stiffness                            | 51.84                 | cmH <sub>2</sub> O                                                     |
| $C_c$                                          | Contractile ASMC passive anisotropic stiffness                          | 1.14x10 <sup>-3</sup> | cmH <sub>2</sub> O                                                     |
| $\beta_c$                                      | Contractile ASMC passive anisotropic exponential parameter              | 2.74                  |                                                                        |
| $\eta_e$                                       | ECM passive isotropic stiffness                                         | 51.84                 | cmH <sub>2</sub> O                                                     |
| $C_e$                                          | ECM passive anisotropic stiffness                                       | 18.1                  | cmH <sub>2</sub> O                                                     |
| $\beta_e$                                      | ECM passive anisotropic exponential parameter                           | 1.48                  |                                                                        |
| $T_c$                                          | Agonist-induced active contraction parameter                            | 1000                  | cmH <sub>2</sub> O                                                     |
| $\lambda_{act}$                                | Collagen recruitment stretch                                            | 1                     |                                                                        |
| $\lambda_z$                                    | Axial stretch ratio                                                     | 1                     |                                                                        |
| $\Theta$                                       | Fiber angle                                                             | 0                     | radians                                                                |
| $P_1$                                          | Lumen pressure                                                          | 0                     | cmH <sub>2</sub> O                                                     |
| $P_2$                                          | External pressure                                                       | 0                     | cmH <sub>2</sub> O                                                     |

Also, the model is not very sensitive to changes in ASMC responsiveness to contractile agonist ( $T_c$ ), inflammation-induced contractile agonist release ( $a_{k\mu}$ ), and mechanical-stress induced contractile agonist release ( $a_c$ ), as each of these result in only small (nonlinear) changes in inner radius.

#### 4 Volume Fractions

In order to compare results more directly from the simulations in Figs. 4 and 6, we plot the volume fractions of the airway wall constituents (proliferating, contractile ASMCs and ECM) as functions of the radius in Fig. S2. The left column depicts the constituent volume fractions taken at 3 separate days (increasing in time, moving down the column) from the simulation using the parameters corresponding to the circled point on the surfaces of Fig. 4a,b, while the right column depicts those corresponding to the circled point on the surfaces of Fig. 6a,b. The volume fractions of the constituents remain flat and only slightly increase during inflammation challenges (moving down



Table 3: Default Model Parameters Differing Between the Two Layers

| Parameter  | Definition                                                               | Inner layer | Outer layer           | Units                                 |
|------------|--------------------------------------------------------------------------|-------------|-----------------------|---------------------------------------|
| $c_{p0}$   | Baseline cell proliferation rate constant                                | 0           | 1/3                   | day <sup>-1</sup>                     |
| $c_{pc}$   | Proliferative to contractile ASMC switching rate constant                | 0           | 2/3                   | day <sup>-1</sup>                     |
| $c_{e0}$   | Baseline (low) contractile to proliferative switching rate constant      | 0           | 2.50x10 <sup>-3</sup> | day <sup>-1</sup>                     |
| $c_{e1}$   | Medium contractile to proliferative switching rate constant              | 0           | 5.0x10 <sup>-3</sup>  | day <sup>-1</sup>                     |
| $c_{e2}$   | High contractile to proliferative switching rate constant                | 0           | 5.0x10 <sup>-2</sup>  | day <sup>-1</sup>                     |
| $c_a$      | Contractile cell apoptosis rate constant                                 | 0           | 1.19x10 <sup>-2</sup> | day <sup>-1</sup>                     |
| $c_{de}$   | Baseline ECM degradation rate constant                                   | 0           | 9.70x10 <sup>-3</sup> | day <sup>-1</sup>                     |
| $c_{e0}$   | Baseline (low) ECM deposition rate constant                              | 0           | 1.0x10 <sup>-3</sup>  | mg mm <sup>-3</sup> day <sup>-1</sup> |
| $c_{e1}$   | Medium ECM deposition rate constant                                      | 0           | 1.0x10 <sup>-3</sup>  | mg mm <sup>-3</sup> day <sup>-1</sup> |
| $c_{e2}$   | High ECM deposition rate constant                                        | 0           | 1.0x10 <sup>-3</sup>  | mg mm <sup>-3</sup> day <sup>-1</sup> |
| $c_{pe}$   | ECM deposition, via proliferative cells, rate constant                   | 0           | 1.0x10 <sup>-3</sup>  | day <sup>-1</sup>                     |
| $c_p^f$    | Stress-induced cell proliferation rate constant                          | 0           | 0                     | day <sup>-1</sup>                     |
| $c_{cp}^f$ | Stress-induced contractile to proliferative ASMC switching rate constant | 0           | 5.0x10 <sup>-3</sup>  | day <sup>-1</sup>                     |

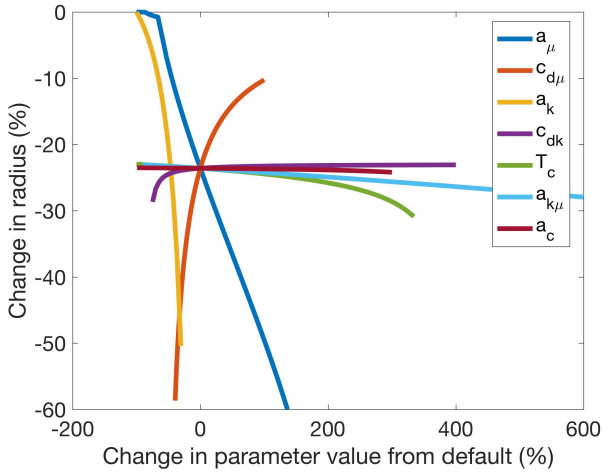

Fig. S1: *Sensitivity Study*. Change in inner radius, at 5 days post final challenge, from original radius  $R_1=1.8\text{mm}$ , as a function of change in parameter from default value (Table 2). The airway was challenged every day for a 50 day period with inflammation challenges, except for the study varying  $a_k$ , in which contractile agonist challenges were used. The default value for  $a_k$  was chosen so that low frequency challenges led to non-trivial remodelling, but at higher frequencies used here (one per day for 50 days), growth/contraction into the lumen results with this default value.

the left column). The increase in proliferating ASMCs towards the outer wall of the airway is due to the tensile mechanical stress-induced increase in phenotype switching rate. Thus, the figures in the right column depict the local increase in proliferative, and associated decrease in contractile, ASMCs during phenotype switching. Also, the airway geometry shifts to the right from day 28 to day 32, as the contractile agonist gradually clears from the tissue and the airway relaxes.

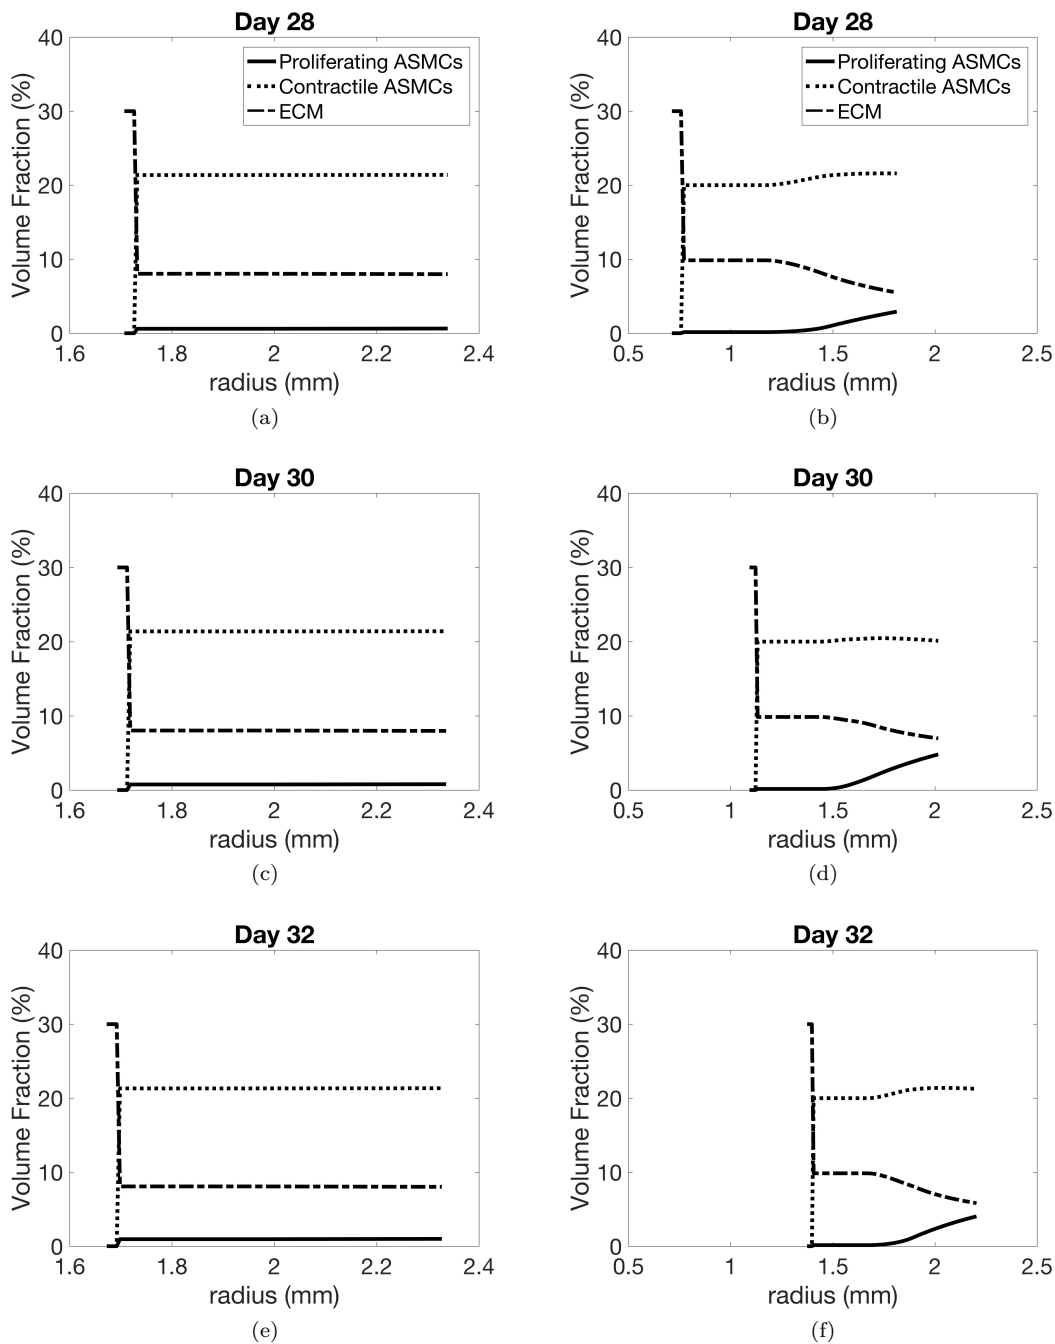

Fig. S2: *Volume Fractions vs. Radius*. Volume fractions of proliferating, contractile airway smooth muscle cells (ASMCs) and extracellular matrix (ECM) plotted as a function of radius taken at days 28, 30, and 32, corresponding to (left column) the circled point on the surfaces of Fig. 4a,b and (right column) the circled point on the surfaces of Fig. 6a,b. The inner radius shifts to the left more dramatically moving down the right column compared with the left column, as contractile agonist is cleared from the tissue following the challenge. Clearly, contractile agonist-induced deformation is dominant in the agonist-challenge simulations.

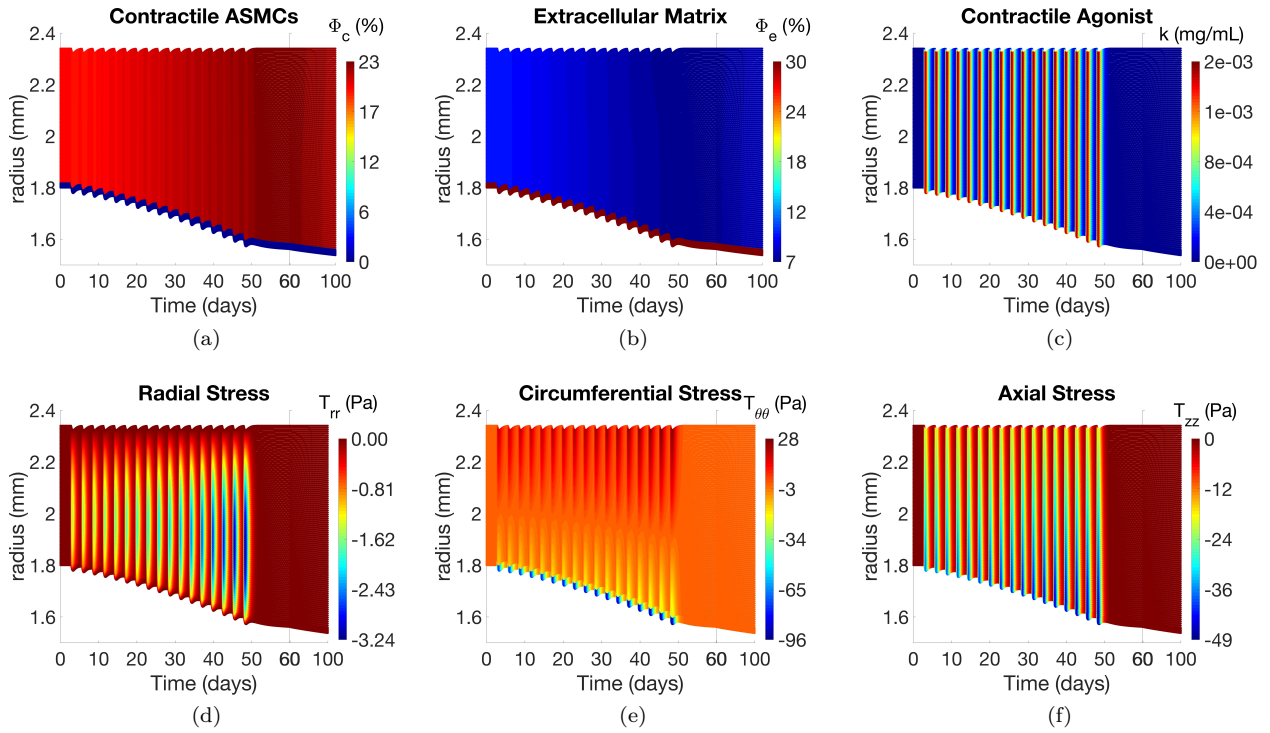

Fig. S3: *Volume Fractions, Contractile Agonist Concentration, and Mechanical Stresses during Inflammatory Challenges*. Illustrative results are evaluated at the circled point on the surface of Fig. 4a: volume fractions of (a) contractile ASMCs, (b) extracellular matrix, and concentration of (c) contractile agonist; Cauchy stresses in the (d) radial, (e) circumferential, and (f), (f) axial directions

## 5 Volume Fractions, Contractile Agonist Concentration, and Mechanical Stresses

The volume fractions, local contractile agonist concentrations, and mechanical stress distributions for the selected points (not already included) in Figs. 4 and 6 are depicted in Figs. S3 and S4, respectively. During inflammation-only challenges, the gradients of the constituents and agonists across the airway radius (Figs. S3a-c and 4c) are low compared to contractile agonist challenges (Figs. S4a-c and 6c), in which the local mechanotransduction-induced ASMC phenotype switching leads to local increases in ASM towards the outer wall (associated with regions on increased circumferential tensile stress), and thus relatively higher volume fractions of proliferating ASMCs and lower volume fractions of contractile ASMCs and ECM. For both inflammation (Fig. S3d-f) and agonist (Fig. S4d-f) challenges, radial stresses are compressive in the mid-wall and zero at the boundaries (thus matching the zero pressure boundary conditions), circumferential stresses are tensile in the outer portion of the wall and compressive in the inner portion, and axial stresses are compressive (due to incompressibility), with agonist challenges resulting in much higher stress magnitudes due to the active contraction.

## 6 Effect on Remodelling of Changes in Phenotype Switching Rate or Intrinsic Proliferation Rate Modulated by Mechanical Tensile or Compressive Stresses

Similar amounts of remodelling are observed for increases in both tensile and compressive stress-modulated phenotype switching rates,  $c_{cp}^f$  and decreasing agonist clearance rate,  $c_{dk}$ , with no clear threshold effect (Fig. S5a,b). For the same parameter ranges, agonist resolution times are also observed to be similar (note some simulation results are not plotted due to contraction/growth into the lumen during challenges). Moreover, agonist resolution time appears to be relatively independent of  $c_{cp}^f$  for both cases (Fig. S5c,d). For a selected parameter set (shown as circles on the surfaces in Figs. S5a-d), distributions of the proliferative ASMC volume fraction are significantly different in the two cases. Larger volume fractions are observed at the outer edge of the airway wall in the tensile stress-modulated case (Fig. S5e) and at the inner edge in the compressive stress-modulated case (Fig. S5f).

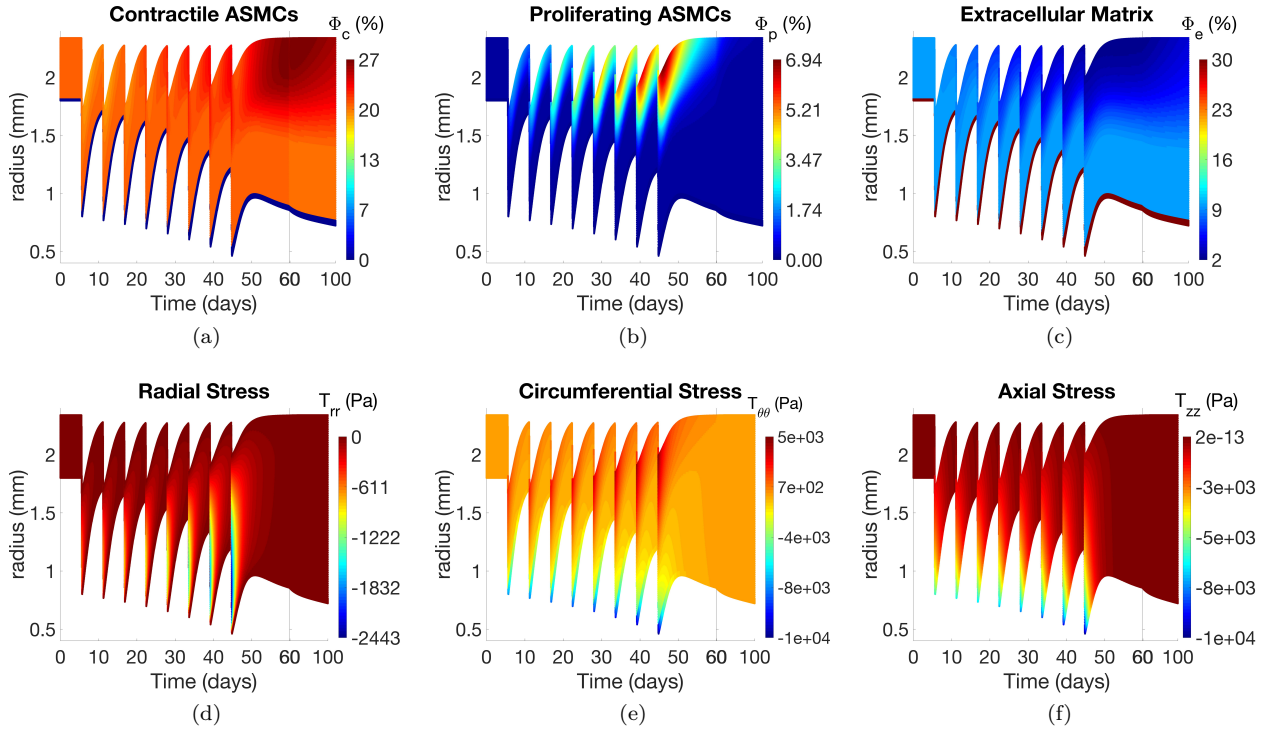

Fig. S4: *Volume Fractions, Contractile Agonist Concentration, and Mechanical Stresses during Contractile Agonist Challenges.* Illustrative results are evaluated at the circled point on the surface of Fig. 6a: volume fractions of (a) contractile, (b) proliferating ASMCs, and (c) extracellular matrix; Cauchy stresses in the (d) radial, (e) circumferential, and (f) axial directions

For our given initial conditions, both tensile and compressive stress-induced phenotype switching ( $c_{cp}^f$ ) results in a greater amount of airway remodelling (Fig. S5a,b) than stress-induced increase in proliferation rate ( $c_p^f$ ; Fig. S6a,b); again, note that some simulation results are not plotted due to contraction/growth into the lumen during challenges. Agonist retention is similar between the two cases (cf. Figs. S5c,d, S6c,d). Slightly less contraction is observed during challenges with increasing  $c_{cp}^f$  compared with increasing  $c_p^f$ . In the former case (Fig. S5e, S5f), contractile cells are lost due to phenotype switching, and in the latter case (Fig. S6e, S6f), the intrinsic proliferation rate of the current (lower) population of proliferating ASMCs is increased.

## 7 Comparison to Previous Modelling Results

Qualitatively, very similar results were obtained between the current study and our previous study (Chernyavsky et al (2014); Fig. S7). Severe remodelling in the former (red colour in Figs. S7a,b) corresponds to increased remodelling towards the lumen in the latter (red colour in Figs. S7c,d, respectively corresponding to the inward remodelling shown in Figs. 8a, 4a).

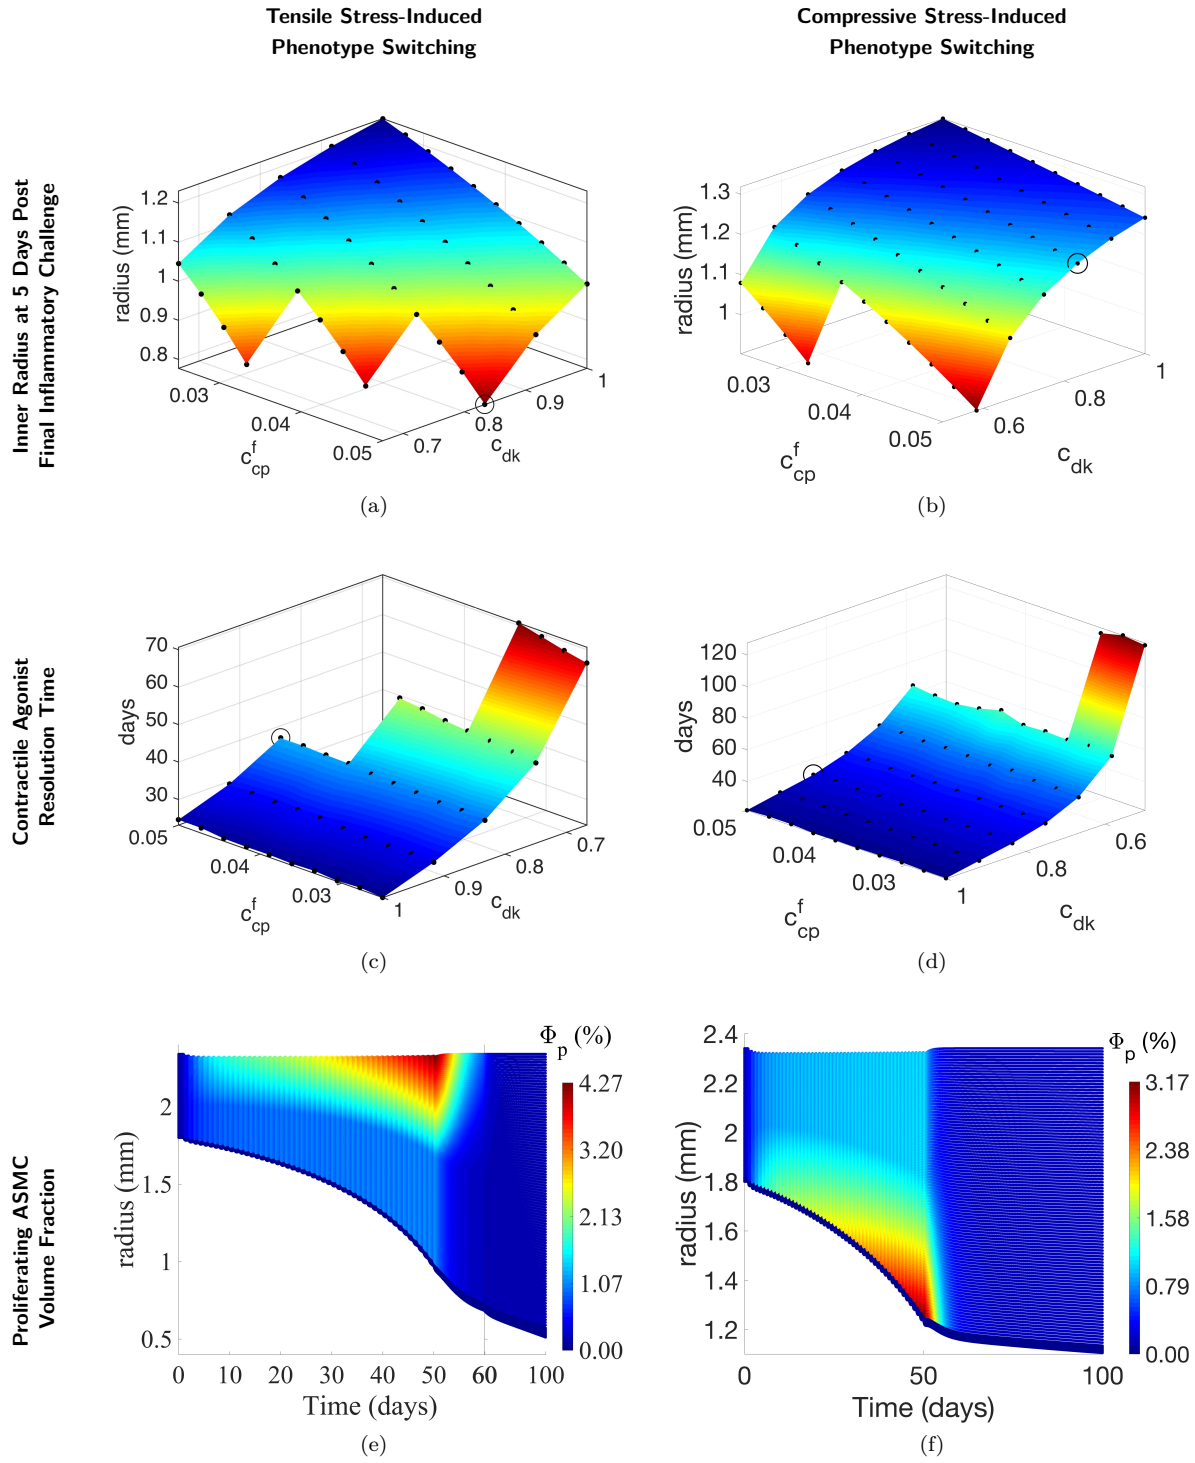

Fig. S5: *Effect of phenotype switching rate modulated by tensile vs compressive stress: Variation in (a), (b) remodelled geometry (1<sup>st</sup> row) and (c), (d) agonist resolution rate (2<sup>nd</sup> row) with selected parameter values of stress-induced phenotype switching ( $c_{cp}^f$ ) and agonist resolution rate ( $c_{dk}$ ). The proliferating airway smooth muscle cell volume fraction (e), (f) is plotted as functions of radius and time for parameter value pairs indicated by the circled points on the surfaces.*





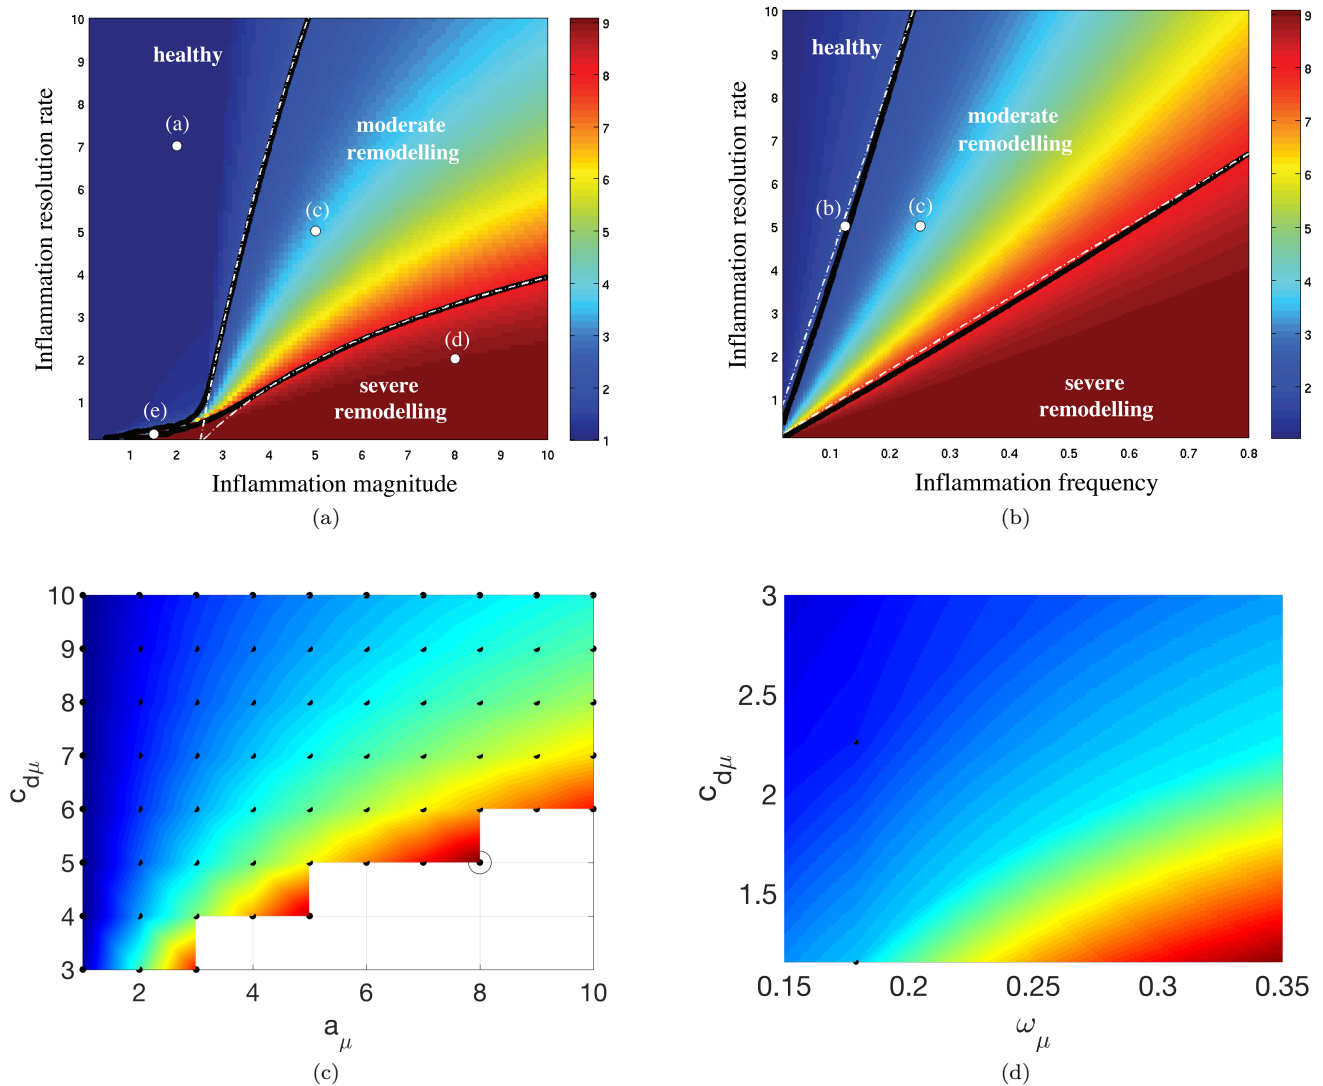

Fig. S7: Comparison of Current Model Results to Chernyavsky et al (2014). Top row: results from Chernyavsky et al (2014), showing fold-increase in ASM population size after 300 days (colour scale) as a function of the inflammation resolution rate and the (a) inflammation magnitude or (b) inflammation challenge frequency; Bottom row: results from current study, showing inner radius at 5 days post final inflammatory challenge (colour scale) as a function of the inflammation resolution rate and the (c) inflammation magnitude (rotated view of Fig. 8a) or (d) challenge frequency (rotated and zoomed view of Fig. 4a).

## References

- Alrifai M, Marsh LM, Dicke T, Kilic A, Conrad MC, Renz H, Garn H (2014) Compartmental and temporal dynamics of chronic inflammation and airway remodelling in a chronic asthma mouse model. *PLOS ONE* 9(1):e85,839
- Aparício P, Thompson MS, Watton PN (2016) A novel chemo-mechano-biological model of arterial tissue growth and remodelling. *Journal of biomechanics* 49(12):2321–2330
- Ateshian G (2007) On the theory of reactive mixtures for modeling biological growth. *Biomechanics and Modeling in Mechanobiology* 6:423–445
- Ateshian G, Ricken T (2010) Multigenerational interstitial growth of biological tissues. *Biomechanics and Modeling in Mechanobiology* 9:689–702
- Ateshian GA (2011) The role of mass balance equations in growth mechanics illustrated in surface and volume dissolutions. *Journal of Biomechanical Engineering* 133(1):011,010

- Benayoun L, Druilhe A, Dombret MC, Aubier M, Pretolani M (2003) Airway structural alterations selectively associated with severe asthma. *American Journal of Respiratory and Critical Care Medicine* 167(10):1360–1368
- Berair R, Saunders R, Brightling CE (2013) Origins of increased airway smooth muscle mass in asthma. *BMC medicine* 11(1):145
- Bersi MR, Bellini C, Wu J, Montaniel KR, Harrison DG, Humphrey JD (2016) Excessive adventitial remodeling leads to early aortic maladaptation in angiotensin-induced hypertension. *Hypertension* DOI 10.1161/HYPERTENSIONAHA.115.06262
- Bossé Y, Chin LY, Paré PD, Seow CY (2009) Adaptation of airway smooth muscle to basal tone: relevance to airway hyperresponsiveness. *American journal of respiratory cell and molecular biology* 40(1):13–18
- Bowen R (1976) Theory of Mixtures. In *Continuum Physics*, ed. AC Eringen. Academic Press, New York
- Brightling C, Bradding P, Pavord I, Wardlaw A (2003) New insights into the role of the mast cell in asthma. *Clinical & Experimental Allergy* 33(5):550–556
- Brightling C, Gupta S, Gonem S, Siddiqui S (2012) Lung damage and airway remodelling in severe asthma. *Clinical & Experimental Allergy* 42(5):638–649
- Brightling CE, Bradding P, Symon FA, Holgate ST, Wardlaw AJ, Pavord ID (2002) Mast-cell infiltration of airway smooth muscle in asthma. *New England Journal of Medicine* 346(22):1699–1705
- Brook B, Peel S, Hall I, Politi A, Sneyd J, Bai Y, Sanderson M, Jensen O (2010) A biomechanical model of agonist-initiated contraction in the asthmatic airway. *Respiratory Physiology and Neurobiology* 170:44–58
- Brown RH, Togias A (2016) Measurement of intra-individual airway tone heterogeneity and its importance in asthma. *Journal of Applied Physiology* p 00545
- Carr TF, Zeki AA, Kraft M (2017) Eosinophilic and non-eosinophilic asthma. *American Journal of Respiratory and Critical Care Medicine* DOI 10.1164/rccm.20161102232PP
- Chernyavsky I, Crosier H, Chapman L, Kimpton L, Hiorns J, Brook B, Jensen O, Billington C, Hall I, Johnson S (2014) The role of inflammation resolution speed in airway smooth muscle mass accumulation in asthma: Insight from a theoretical model. *PLOS ONE* 9(3):e90,162
- Clifford PS, Ella SR, Stupica AJ, Nourian Z, Li M, Martinez-Lemus LA, Dora KA, Yang Y, Davis MJ, Pohl U, Meininger GA, Hill MA (2011) Spatial distribution and mechanical function of elastin in resistance arteries. *Arteriosclerosis, thrombosis, and vascular biology* 31(12):2889–2896
- Coutts A, Chen G, Stephens N, Hirst S, Douglas D, Eichholtz T, Khalil N (2001) Release of biologically active  $\text{tgf-}\beta$  from airway smooth muscle cells induces autocrine synthesis of collagen. *American Journal of Physiology-Lung Cellular and Molecular Physiology* 280(5):L999–L1008
- Coxson H, Quiney B, Sin D, Xing L, McWilliams A, Mayo J, Lam S (2008) Airway wall thickness assessed using computed tomography and optical coherence tomography. *American Journal of Respiratory and Critical Care Medicine* 177(11):1201–1206
- Dekkers BG, Pehlić A, Mariani R, Bos IST, Meurs H, Zaagsma J (2012) Glucocorticosteroids and  $\beta$ 2-adrenoceptor agonists synergize to inhibit airway smooth muscle remodeling. *Journal of Pharmacology and Experimental Therapeutics* 342(3):780–787
- Desmoulière A, Chaponnier C, Gabbiani G (2005) Tissue repair, contraction, and the myofibroblast. *Wound repair and regeneration* 13(1):7–12
- Eskandari M, Pfaller MR, Kuhl E (2013) On the role of mechanics in chronic lung disease. *Materials* 6(12):5639–5658
- Froese AR, Shimbori C, adn Mark Inman PSB, Obex S, Fatima S, Jenkins G, Gauldie J, Ask K, Kolb M (2016) Stretch-induced activation of transforming growth factor- $\beta$ 1 in pulmonary fibrosis. *Am J Resp Crit Care Med* 194:84–96
- Gajarsa JJ, Kloner RA (2011) Left ventricular remodeling in the post-infarction heart: a review of cellular, molecular mechanisms, and therapeutic modalities. *Heart Failure Reviews* 16(1):13–21
- Gasser T, Ogden R, Holzapfel G (2006) Hyperelastic modelling of arterial layers with distributed collagen fibre orientations. *Journal of the Royal Society Interface* 3:15–35
- Gazzola M, Lortie K, Henry C, Mailhot-Larouche S, Chapman DG, Seow CY, Pare PD, King G, Boulet LP, Bosse Y (2017) Airway smooth muscle tone increases airway responsiveness in young healthy adults. *American Journal of Respiratory and Critical Care Medicine* 195:A4952
- Ge Q, Poniris MH, Moir LM, Black JL, Burgess JK (2012) Combined beta-agonists and corticosteroids do not inhibit extracellular matrix protein production in vitro. *Journal of allergy* 2012:403,059



- Gerarduzzi C, Di Battista JA (2017) Myofibroblast repair mechanisms post-inflammatory response: a fibrotic perspective. *Inflammation Research* 66(6):451–465
- Gleason R, Humphrey J (2005) A 2d constrained mixture model for arterial adaptations to large changes in flow, pressure and axial stretch. *Mathematical Medicine and Biology* 22:347–369
- Gleason R, Taber L, Humphrey J (2004) A 2-d model of flow-induced alterations in the geometry, structure, and properties of carotid arteries. *American Society of Mechanical Engineers (ASME) Journal of Biomechanical Engineering* 126:371–381
- Grainge CL, Lau LC, Ward JA, Dulay V, Lahiff G, Wilson S, Holgate S, Davies DE, Howarth PH (2011) Effect of bronchoconstriction on airway remodeling in asthma. *New England Journal of Medicine* 364(21):2006–2015
- Grinnell F, Ho CH (2002) Transforming growth factor  $\beta$  stimulates fibroblast–collagen matrix contraction by different mechanisms in mechanically loaded and unloaded matrices. *Experimental cell research* 273(2):248–255
- Grytsan A, Eriksson TSE, Watton PN, Gasser TC (2017) Growth description for vessel wall adaptation: A thick-walled mixture model of abdominal aortic aneurysm evolution. *Materials* 10(9)
- Guilbert TW, Morgan WJ, Zeiger RS, Mauger DT, Boehmer SJ, Szefer SJ, Bacharier LB, Lemanske Jr RF, Strunk RC, Allen DB, et al (2006) Long-term inhaled corticosteroids in preschool children at high risk for asthma. *New England Journal of Medicine* 354(19):1985–1997
- Gunst S, Warner DO, Wilson T, Hyatt R (1988) Parenchymal interdependence and airway response to methacholine in excised dog lobes. *Journal of Applied Physiology* 65(6):2490–2497
- Halwani R, Al-Muhsen S, Al-Jahdali H, Hamid Q (2011) Role of transforming growth factor- $\beta$  in airway remodeling in asthma. *American journal of respiratory cell and molecular biology* 44(2):127–133
- Harvey BC, Parameswaran H, Lutchen KR (2013) Can tidal breathing with deep inspirations of intact airways create sustained bronchoprotection or bronchodilation? *Journal of applied physiology* 115(4):436–445
- Hassan M, Jo T, Risse PA, Tolloczko B, Lemiere C, Olivenstein R, Hamid Q, Martin JG (2010) Airway smooth muscle remodeling is a dynamic process in severe long-standing asthma. *J Allergy Clin Immunol* 125:1037–1045
- Hill MR, Duan X, Gibson G, Watkins S, Robertson A (2012) A theoretical and non-destructive experimental approach for direct inclusion of measured collagen orientation and recruitment into mechanical models of the artery wall. *Journal of Biomechanics* 45:762–771
- Hill MR, Simon MA, Valdez-Jasso D, Zhang W, Champion HC, Sacks MS (2014) Structural and mechanical adaptations of right ventricle free wall myocardium to pressure overload. *Annals of Biomedical Engineering* 42:2451–2465
- Hiorns J, Jensen O, Brook B (2014) Nonlinear compliance modulates dynamic bronchoconstriction in a multiscale airway model. *Biophysical Journal* 107(12):3021–3033
- Hiorns JE, Jensen OE, Brook BS (2016) Static and dynamic stress heterogeneity in a multiscale model of the asthmatic airway wall. *Journal of Applied Physiology* 121(1):233–247
- Hirota JA, Nguyen TT, Schaafsma D, Sharma P, Tran T (2009) Airway smooth muscle in asthma: Phenotype plasticity and function. *Pulmonary Pharmacology & Therapeutics* 22(5):370 – 378
- Hoffman BD, Grashoff C, Schwartz MA (2011) Dynamic molecular processes mediate cellular mechanotransduction. *Nature* 475(7356):316–323
- Holgate ST (2011) The sentinel role of the airway epithelium in asthma pathogenesis. *Immunological Reviews* 242(1):205–219
- Holzappel G (2000) *Nonlinear Solid Mechanics: A Continuum Approach for Engineering*. Wiley, Chichester, New York
- Holzappel G, Ogden R (2010) Constitutive modelling of arteries. *Proceedings of the Royal Society A: Mathematical, Physical and Engineering Sciences* 466:1551–1597
- Humphrey J, Rajagopal K (2002) A constrained mixture model for growth and remodeling of soft tissues. *Mathematical Models and Methods in Applied Sciences (M3AS)* 12:407–430
- Humphrey J, Rajagopal K (2003) A constrained mixture model for arterial adaptations to a sustained step change in blood flow. *Biomechanics and Modeling in Mechanobiology* 2:109–126
- Huyghe J, Janssen J (1997) Quadriphasic mechanics of swelling incompressible porous media. *Int J Engng Sci* 35:793–802
- Ijpmma G, Panariti A, Lauzon AM, Martin JG (2017) Directional preference of airway smooth muscle mass increase in human asthmatic airways. *American Journal of Physiology-Lung Cellular and Molecular Physiology* 312(6):L845–L854

- James AL (2017) Airway remodeling in asthma: Is it fixed or variable? *American Journal of Respiratory and Critical Care Medicine* 195(8):968–970
- James AL, Bai TR, Mauad T, Abramson MJ, Dolhnikoff M, McKay KO, Maxwell PS, Elliot JG, Green FH (2009) Airway smooth muscle thickness in asthma is related to severity but not duration of asthma. *European Respiratory Journal* 34(5):1040–1045
- James AL, Elliot JG, Jones RL, Carroll ML, Mauad T, Bai TR, Abramson MJ, McKay KO, Green FH (2012) Airway smooth muscle hypertrophy and hyperplasia in asthma. *American journal of respiratory and critical care medicine* 185(10):1058–1064
- Johnson JR, Wiley RE, Fattouh R, Swirski FK, Gajewska BU, Coyle AJ, Gutierrez-Ramos JC, Ellis R, Inman MD, Jordana M (2004) Continuous exposure to house dust mite elicits chronic airway inflammation and structural remodeling. *American journal of respiratory and critical care medicine* 169(3):378–385
- Kariyawasam HH, Aizen M, Barkans J, Robinson DS, Kay AB (2007) Remodeling and airway hyperresponsiveness but not cellular inflammation persist after allergen challenge in asthma. *American Journal of Respiratory and Critical Care Medicine* 175(9):896–904
- Kistemaker LEM, Bos ST, Mudde WM, Hylkema MN, Hiemstra PS, Wess J, Meurs H, Kerstjens HAM, Gosens R (2014) Muscarinic m3 receptors contribute to allergen-induced airway remodeling in mice. *American Journal of Respiratory Cell and Molecular Biology* 50(4):690–698
- Kostenis E, Ulven T (2006) Emerging roles of dp and crth2 in allergic inflammation. *Trends in Molecular Medicine* 12(4):148–158
- Kuo C, Lim S, King NJC, Johnston SL, Burgess JK, Black JL, Oliver BG (2011) Rhinovirus infection induces extracellular matrix protein deposition in asthmatic and nonasthmatic airway smooth muscle cells. *American Journal of Physiology - Lung Cellular and Molecular Physiology* 300(6):L951–L957
- Lambert R, Wiggs B, Kuwano K, Hogg J, Pare P (1993) Functional significance of increased airway smooth muscle in asthma and copd. *Journal of Applied Physiology* 74(6):2771–2781
- Lambert RK, Paré PD (1997) Lung parenchymal shear modulus, airway wall remodeling, and bronchial hyperresponsiveness. *Journal of applied physiology* 83(1):140–147
- Lanir Y (1979) A structural theory for the homogeneous biaxial stress-strain relationships in flat collagenous tissues. *Journal of Biomechanics* 12:423–436
- Lanir Y (1983) Constitutive equations for fibrous connective tissues. *Journal of Biomechanics* 16:1–12
- LaPrad AS, Szabo T, Suki B, Lutchen K (2010) Tidal stretches do not modulate responsiveness of intact airways in vitro. *Journal of Applied Physiology* 109:295–304
- Latourelle J, Fabry B, Fredberg JJ (2002) Dynamic equilibration of airway smooth muscle contraction during physiological loading. *Journal of Applied Physiology* 92(2):771–779
- Lauzon AM, Bates JH (2000) Kinetics of respiratory system elastance after airway challenge in dogs. *Journal of Applied Physiology* 89(5):2023–2029
- Leclere M, Lavoie-Lamoureux A, Joubert P, Relave F, Setlakwe EL, Beauchamp G, Couture C, Martin JG, Lavoie JP (2012) Corticosteroids and antigen avoidance decrease airway smooth muscle mass in an equine asthma model. *American Journal of Respiratory Cell and Molecular Biology* 47(5):589–596
- Macklem PT (1996) A theoretical analysis of the effect of airway smooth muscle load on airway narrowing. *American journal of respiratory and critical care medicine* 153(1):83–89
- Mailhot-Larouche S, Deschênes L, Gazzola M, Lortie K, Henry C, Brook BS, Morissette MC, Bossé Y (2018) Repeated airway constrictions in mice do not alter respiratory function. *Journal of Applied Physiology* DOI 10.1152/jappphysiol.01073.2017, URL <https://doi.org/10.1152/jappphysiol.01073.2017>, PMID: 29470147
- Martinez-Lemus LA, Hill MA, Meininger GA (2009) The plastic nature of the vascular wall: A continuum of remodeling events contributing to control of arteriolar diameter and structure. *Physiology* 24(1):45–57
- McKay KO, Wiggs BR, Paré PD, Kamm RD (2002) Zero-stress state of intra- and extraparenchymal airways from human, pig, rabbit, and sheep lung. *Journal of Applied Physiology* 92(3):1261–1266
- McMillan S, Lloyd C (2004) Prolonged allergen challenge in mice leads to persistent airway remodelling. *Clinical & Experimental Allergy* 34(3):497–507
- Miranda C, Busacker A, Balzar S, Trudeau J, Wenzel SE (2004) Distinguishing severe asthma phenotypes: role of age at onset and eosinophilic inflammation. *Journal of Allergy and Clinical Immunology* 113(1):101–108
- Montesano R, Orci L (1988) Transforming growth factor beta stimulates collagen-matrix contraction by fibroblasts: implications for wound healing. *Proceedings of the National Academy of Sciences* 85(13):4894–4897

- Moulton D, Goriely A (2011a) Circumferential buckling instability of a growing cylindrical tube. *Journal of the Mechanics and Physics of Solids* 59:525–537
- Moulton D, Goriely A (2011b) Possible role of differential growth in airway wall remodeling in asthma. *Journal of Applied Physiology* 110:1003–1012
- Naveed S, Clements D, Jackson DJ, Philp C, Billington CK, Soomro I, Reynolds C, Harrison TW, Johnston SL, Shaw DE, Johnson SR (2017) Matrix metalloproteinase-1 activation contributes to airway smooth muscle growth and asthma severity. *American Journal of Respiratory and Critical Care Medicine* 195(8):1000–1009
- Noble PB, Jones RL, Cairncross A, Elliot JG, Mitchell HW, James AL, McFawn PK (2013) Airway narrowing and bronchodilation to deep inspiration in bronchial segments from subjects with and without reported asthma. *Journal of Applied Physiology* 114:1460–1471
- Noble PB, Pascoe CD, Lan B, Ito S, Kistemaker LE, Tatler AL, Pera T, Brook BS, Gosens R, West AR (2014) Airway smooth muscle in asthma: Linking contraction and mechanotransduction to disease pathogenesis and remodelling. *Pulmonary Pharmacology and Therapeutics* 29:96–107
- Oenema TA, Maarsingh H, Smit M, Groothuis GMM, Meurs H, Gosens R (2013) Bronchoconstriction induces  $\text{tgf-}\beta$  release and airway remodelling in guinea pig lung slices. *PLOS ONE* 8(6):1–9
- Ojiaku MCA, Cao DG, Zhu DW, Yoo MEJ, Shumyatcher MM, Himes DBE, An DSS, Dr Reynold A Panetier J (2017)  $\text{Tgf-}\beta 1$  evokes human airway smooth muscle cell shortening and hyperresponsiveness via  $\text{smad3}$ . *American Journal of Respiratory Cell and Molecular Biology* 0(ja):null, DOI 10.1165/rcmb.2017-0247OC, URL <https://doi.org/10.1165/rcmb.2017-0247OC>, PMID: 28984468, <https://doi.org/10.1165/rcmb.2017-0247OC>
- Pelaia G, Renda T, Gallelli L, Vatrella A, Busceti MT, Agati S, Caputi M, mario Cazzola, Maselli R, Marsico SA (2008) Molecular mechanisms underlying airway smooth muscle contraction and proliferation: Implications for asthma. *Computer Methods in Applied Mechanics and Engineering* 314:222–268
- Politi AZ, Donovan GM, Tawhai MH, Sanderson MJ, Lauzon AM, Bates JH, Sneyd J (2010) A multiscale, spatially distributed model of asthmatic airway hyper-responsiveness. *Journal of theoretical biology* 266(4):614–624
- Pothen JJ, Poynter ME, Lundblad LKA, Bates JHT (2016) Dissecting the inflammatory twitch in allergically inflamed mice. *AM J Physiol Lung Cell Mol Physiol* 310:L1003–L1009
- Ren JS (2013) Growth and residual stresses of arterial walls. *Journal of Theoretical Biology* 337(Supplement C):80–88, DOI <https://doi.org/10.1016/j.jtbi.2013.08.008>
- Robertson A, Hill M, Li D (2011) Structurally motivated damage models for arterial walls- theory and application. In: Ambrosi D, Quarteroni A, Rozza G (eds) *Modelling of Physiological Flows, Modeling, Simulation and Applications*, vol 5, Springer-Verlag
- Rodriguez EK, Hoger A, McCulloch AD (1994) Stress-dependent finite growth in soft elastic tissues. *Journal of Biomechanics* 27(4):455–467
- Sacks M (2003) Incorporation of experimentally-derived fiber orientation into a structural constitutive model for planar collagenous tissues. *American Society of Mechanical Engineers (ASME) Journal of Biomechanical Engineering* 125:280–287
- Saunders R, Siddiqui S, Kaur D, Doe C, Sutcliffe A, Hollins F, Bradding P, Wardlaw A, Brightling CE (2009) Fibrocyte localization to the airway smooth muscle is a feature of asthma. *Journal of Allergy and Clinical Immunology* 123(2):376–384
- Silva PL, Passaro CP, Cagido VR, Bozza M, Dolhnikoff M, Negri EM, Morales MM, Capelozzi VL, Zin WA, Rocco PR (2008) Impact of lung remodelling on respiratory mechanics in a model of severe allergic inflammation. *Respiratory Physiology & Neurobiology* 160(3):239–248
- Singh SR, Sutcliffe A, Kaur D, Gupta S, Desai D, Saunders R, Brightling CE (2014)  $\text{Ccl2}$  release by airway smooth muscle is increased in asthma and promotes fibrocyte migration. *Allergy* 69(9):1189–1197
- Sjöberg L, Nilsson AZ, Lei Y, Gregory J, Adner M, Nilsson G (2017) Interleukin 33 exacerbates antigen driven airway hyperresponsiveness, inflammation and remodeling in a mouse model of asthma. *Scientific Reports* 7
- Skalak R (1980) Growth as a finite displacement field. *Proceedings of the IUTAM Symposium on Finite Elasticity* pp 347–355
- Smith PG, Janiga KE, Bruce MC (1994) Strain increases airway smooth muscle cell proliferation. *American Journal of Respiratory Cell and Molecular Biology* 10(1):85–90
- Smith PG, Tokui T, Ikebe M (1995) Mechanical strain increases contractile enzyme activity in cultured airway smooth muscle cells. *American Journal of Physiology - Lung Cellular and Molecular Physiology* 268(6):L999–L1005

- Smith PG, Moreno R, Ikebe M (1997) Strain increases airway smooth muscle contractile and cytoskeletal proteins in vitro. *American Journal of Physiology - Lung Cellular and Molecular Physiology* 272(1):L20–L27
- Strunk RC (2007) Childhood asthma management program: Lessons learned. *The Journal of Allergy and Clinical Immunology* 119(1):36–42
- Swartz M, Tschumperlin D, Kamm R, Drazen J (2001) Mechanical stress is communicated between different cell types to elicit matrix remodeling. *PNAS* 98:6180–6185
- Tatler AL, Jenkins G (2012) Tgf- $\beta$  activation and lung fibrosis. *Proceedings of the American Thoracic Society* 9(3):130–136
- Tatler AL, John AE, Jolly L, Habgood A, Porte J, Brightling C, Knox AJ, Pang L, Sheppard D, Huang X, Jenkins G (2011) Integrin  $\alpha\beta 5$ -mediated tgf- $\beta$  activation by airway smooth muscle cells in asthma. *The Journal of Immunology* 187(11):6094–6107
- Truesdell C, Noll W (1965) *The Non-Linear Field Theories of Mechanics*. Springer-Verlag, Berlin, Germany
- Truesdell C, Toupin R (1960) *The Classical Field Theories*, Springer, Heidelberg. *Handbuch der Physik*
- Tschumperlin DJ, Drazen J (2001) Mechanical stimuli to airway remodeling. *American Journal of Respiratory and Critical Care Medicine* 164:S90–S94
- Tschumperlin DJ, Drazen J (2006) Chronic effects of mechanical force on airways. *Annual Review of Physiology* 68:563–583
- Tschumperlin DJ, Dai G, Maly IV, Kikuchi T, Laiho LH, McVittie AK, Haley KJ, Lilly CM, So PT, Lauffenburger DA, et al (2004) Mechanotransduction through growth-factor shedding into the extracellular space. *Nature* 429(6987):83–86
- Valentin A, Humphrey J, Holzapfel G (2013) A finite element-based constrained mixture implementation for arterial growth, remodeling, and adaptation: Theory and numerical verification. *International Journal for Numerical Methods in Biomedical Engineering* 29:822–849
- Wang I, Politi AZ, Tania N, Bai Y, Sanderson MJ, Sneyd J (2008) A mathematical model of airway and pulmonary arteriole smooth muscle. *Biophysical journal* 94(6):2053–2064
- Wenzel SE (2012) Asthma phenotypes: the evolution from clinical to molecular approaches. *Nature medicine* 18(5):716–725
- Williamson JP, McLaughlin RA, Noffsinger WJ, James AL, Baker VA, Curatolo A, Armstrong JJ, Regli A, Shepherd KL, Marks GB, Sampson DD, Hillman DR, Eastwood PR (2011) Elastic properties of the central airways in obstructive lung diseases measured using anatomical optical coherence tomography. *American Journal of Respiratory and Critical Care Medicine* 183(5):612–619
- Wipff PJ, Rifkin DB, Meister JJ, Hinz B (2007) Myofibroblast contraction activates latent tgf- $\beta 1$  from the extracellular matrix. *J Cell Bio* 179:1311–1323
- Woolley KL, Gibson PG, Carty K, Wilson AJ, Twaddell SH, Woolley MJ (1996) Eosinophil apoptosis and the resolution of airway inflammation in asthma. *American journal of respiratory and critical care medicine* 154(1):237–243
- Wright DB, Trian T, Siddiqui S, Pascoe CD, Johnson JR, Dekkers BG, Dakshinamurti S, Bagchi R, Burgess JK, Kanabar V, Ojo OO (2013) Phenotype modulation of airway smooth muscle in asthma. *Pulmonary Pharmacology & Therapeutics* 26(1):42–49
- Zhu Z, Homer RJ, Wang Z, Chen Q, Geba GP, Wang J, Zhang Y, Elias JA (1999) Pulmonary expression of interleukin-13 causes inflammation, mucus hypersecretion, subepithelial fibrosis, physiologic abnormalities, and eotaxin production. *Journal of Clinical Investigation* 103(6):779
